# Supplementary material for: Assessment and initial management of acute undifferentiated fever in tropical and subtropical regions
Source: HighWire-hosted journal article supplement (doi:10.1136/bmj.k4766), 2018-11-29

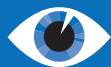

# Fever identification charts

## A quick guide to differentiation and diagnosis in tropical and subtropical regions

Acute undifferentiated febrile illnesses (AUFIs) are characterised by fever of less than two weeks duration without organ-specific symptoms at the onset. This document provides an approach to the diagnosis of common AUFIs in children older than five years as well as in adults in low resource settings, with a focus on early recognition of the most severe non-malarial illnesses.

This document is designed to be printed on three sheets of ordinary A4 paper, which can be mounted vertically

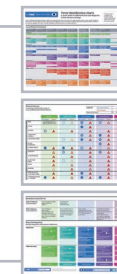

### Local Disease Prevalence

| North Africa                                                     | South Africa            | East Africa                      | West Africa                      | Central Africa                   | Latin America and Caribbean                                      | South and South-East Asia                               | East Asia                             | Australia and New Zealand | Oceania                |
|------------------------------------------------------------------|-------------------------|----------------------------------|----------------------------------|----------------------------------|------------------------------------------------------------------|---------------------------------------------------------|---------------------------------------|---------------------------|------------------------|
| <b>Protozoal</b>                                                 |                         |                                  |                                  |                                  |                                                                  |                                                         |                                       |                           |                        |
| Malaria Limited risk                                             | Malaria                 | Malaria                          | Malaria                          | Malaria                          | Malaria Limited risk                                             | Malaria                                                 | Malaria Parts of China                |                           | Malaria Some countries |
|                                                                  |                         | East African trypanosomiasis     | Acute African trypanosomiasis    | West African trypanosomiasis     | Acute American trypanosomiasis                                   |                                                         |                                       |                           |                        |
| <b>Bacterial</b>                                                 |                         |                                  |                                  |                                  |                                                                  |                                                         |                                       |                           |                        |
| Enteric fever                                                    | Enteric fever           | Enteric fever                    | Enteric fever                    | Enteric fever                    | Enteric fever                                                    | Enteric fever                                           | Enteric fever                         |                           |                        |
| Brucellosis                                                      | Brucellosis             | Brucellosis                      | Brucellosis                      | Brucellosis                      | Brucellosis                                                      | Brucellosis                                             | Brucellosis                           |                           |                        |
| Q fever                                                          |                         | Meningococcal disease (epidemic) | Meningococcal disease (epidemic) | Meningococcal disease (epidemic) | Oroya fever (Bartonellosis)                                      | Melioidosis                                             | Melioidosis                           | Melioidosis               | Melioidosis            |
| <b>Rickettsial</b>                                               |                         |                                  |                                  |                                  |                                                                  |                                                         |                                       |                           |                        |
| Murine Typhus                                                    | Murine Typhus           | Murine Typhus                    | Murine Typhus                    | Murine Typhus                    | Murine Typhus                                                    | Murine Typhus                                           | Murine Typhus                         |                           |                        |
|                                                                  | African tick bite fever | African tick bite fever          |                                  | Epidemic Typhus                  | Scrub typhus                                                     | Scrub typhus                                            | Scrub typhus                          | Australian tick typhus    |                        |
|                                                                  |                         |                                  |                                  | African tick bite fever          | African tick bite fever                                          | In Asia, Scrub typhus is more common than Murine typhus |                                       | Q fever                   |                        |
| Mediterranean spotted fever                                      |                         |                                  |                                  |                                  | Rocky Mountain spotted Fever                                     |                                                         |                                       |                           |                        |
| <b>Spirochetal</b>                                               |                         |                                  |                                  |                                  |                                                                  |                                                         |                                       |                           |                        |
| Leptospirosis                                                    | Leptospirosis           | Leptospirosis                    | Leptospirosis                    | Leptospirosis                    | Leptospirosis                                                    | Leptospirosis                                           |                                       | Leptospirosis             | Leptospirosis          |
|                                                                  |                         | Tick/louse-borne relapsing fever | African tick bite fever          | Tick-borne relapsing fever       | Tick-borne relapsing fever                                       |                                                         |                                       |                           |                        |
|                                                                  |                         | Q fever                          |                                  |                                  |                                                                  |                                                         |                                       |                           |                        |
| <b>Arboviruses</b>                                               |                         |                                  |                                  |                                  |                                                                  |                                                         |                                       |                           |                        |
| No yellow fever risk, limited risk of other arboviral infections | Dengue                  | Dengue                           | Dengue                           | Dengue                           | Dengue                                                           | Dengue                                                  | Dengue                                |                           | Dengue                 |
|                                                                  | Chikungunya             | Chikungunya                      | Chikungunya                      | Chikungunya                      | Chikungunya                                                      | Chikungunya                                             |                                       | Chikungunya (limited)     | Chikungunya            |
|                                                                  |                         |                                  | Zika                             | Zika                             | Zika                                                             | Zika                                                    |                                       |                           | Zika                   |
|                                                                  |                         | Yellow fever                     | Yellow fever                     | Yellow fever                     |                                                                  |                                                         |                                       | Ross River virus          | Ross River virus       |
| <b>Other viruses</b>                                             |                         |                                  |                                  |                                  |                                                                  |                                                         |                                       |                           |                        |
|                                                                  |                         | Crimean-Congo Hemorrhagic Fever  | Crimean-Congo Hemorrhagic Fever  | Crimean-Congo Hemorrhagic Fever  | Hantavirus pulmonary syndrome                                    | Crimean-Congo Hemorrhagic Fever                         | Crimean-Congo Hemorrhagic Fever       |                           |                        |
|                                                                  |                         | Rift valley fever                | Ebola                            | Ebola                            | Hemorrhagic fever with renal syndrome                            | Kyasanur Forest disease                                 | Hemorrhagic fever with renal syndrome |                           |                        |
|                                                                  |                         |                                  | Lassa                            | Marburg                          | Other viral hemorrhagic fevers: Junin, Machupo, Sabia, Guanarito |                                                         | Hantavirus                            |                           |                        |
| <b>Helminthic</b>                                                |                         |                                  |                                  |                                  |                                                                  |                                                         |                                       |                           |                        |
| Filariasis                                                       | Filariasis              | Filariasis                       | Filariasis                       | Filariasis                       | Filariasis                                                       | Filariasis                                              | Filariasis                            |                           | Filariasis             |
| Acute schist-somiasis                                            | Acute schist-somiasis   | Acute schist-somiasis            | Acute schist-somiasis            | Acute schist-somiasis            | Acute schist-somiasis                                            | Acute schist-somiasis (SE Asia)                         | Acute schist-somiasis                 |                           |                        |
|                                                                  | Trichinosis             |                                  |                                  | Trichinosis                      | Trichinosis                                                      |                                                         |                                       |                           |                        |

# Clinical features

of common and important causes of acute undifferentiated febrile illnesses

|                                               |                    |             |                   |                      |                |
|-----------------------------------------------|--------------------|-------------|-------------------|----------------------|----------------|
| Legend                                        | Non-severe disease |             |                   |                      |                |
|                                               | Severe disease     |             |                   |                      |                |
| Frequency of Occurrence<br>Arbitrary cut-offs |                    | Rare<br><5% | Uncommon<br>6–10% | Occasional<br>10–30% | Common<br>>30% |

|                        |                              | Malaria                                        | Enteric fever         | Scrub typhus          | Leptospirosis  | Dengue               |
|------------------------|------------------------------|------------------------------------------------|-----------------------|-----------------------|----------------|----------------------|
| Signs on examination   | Rash                         | Rash suggests alternative diagnosis            |                       |                       |                |                      |
|                        | Eschar                       |                                                |                       |                       |                |                      |
|                        | Jaundice                     |                                                |                       |                       |                |                      |
|                        | Conjunctival suffusion       |                                                |                       |                       |                |                      |
|                        | Lymphadenopathy              | Lymphadenopathy suggests alternative diagnosis |                       |                       |                |                      |
|                        | Muscle tenderness            |                                                |                       |                       |                |                      |
|                        | Enlarged spleen              |                                                |                       |                       |                |                      |
| Systemic complications | Dyspnoea                     |                                                |                       |                       |                |                      |
|                        | Encephalopathy               |                                                |                       |                       |                |                      |
|                        | Acute renal failure          |                                                |                       |                       |                |                      |
|                        | Shock                        |                                                |                       |                       |                |                      |
|                        | Bleeding                     |                                                |                       |                       |                |                      |
| Diagnostics            | White blood cell count       | Normal    High                                 | Normal or low    High | Normal or low    High | Normal    High | Normal or low    Low |
|                        | Thrombocytopenia (< 150,000) |                                                |                       |                       |                |                      |

## Excluders and predictors in clinical findings and basic laboratory tests

|                                                                                      |                                                                                                                                                   |                                                                                                                                           |                                                                                                             |                                                                                                   |                                                                                                                                                                   |
|--------------------------------------------------------------------------------------|---------------------------------------------------------------------------------------------------------------------------------------------------|-------------------------------------------------------------------------------------------------------------------------------------------|-------------------------------------------------------------------------------------------------------------|---------------------------------------------------------------------------------------------------|-------------------------------------------------------------------------------------------------------------------------------------------------------------------|
| <b>Rule out features</b><br>Presence of these features suggest alternative diagnosis | Rash and lymphadenopathy                                                                                                                          | Generalised rash or generalised lymphadenopathy                                                                                           |                                                                                                             |                                                                                                   | Fever >12 days, combination of normal tourniquet test and normal leucocyte count (LR- 0.12)                                                                       |
| <b>Rule in features</b><br>Associated with an increase in probability of disease     | Fever >40 degrees. Splenomegaly, thrombocytopenia and hyperbilirubinemia are associated with moderate to large increase in probability of disease | Fever in endemic areas >3 days duration & presence of abdominal tenderness is associated with moderate increase in probability of disease | Eschar virtually pathognomonic for scrub typhus (OR 46). Eschar seen in 17–86% of patients in recent series | Combination of suffusion, icterus and conjunctival hemorrhage is characteristic of leptospirosis. | Leukopenia and thrombocytopenia. Positive tourniquet test is a good predictor of infection (OR: 4.86) and ascites is a good predictor of severe dengue (OR:13.91) |

## Confirming a diagnosis

### Accuracy and interpretation of specific tests

Serological tests based on antibody detection are confirmatory only on demonstration of fourfold rise in titre in IgG or seroconversion in IgM in paired specimens

|                                                                                                                                    |                                                                                                                       |                                                                                                                                                                                                    |                                                                                                                                                                                                                                                                               |                                                                                                                                                                                                                                                                                                                                          |                                                                                                                                                                                                                                                                                                                  |
|------------------------------------------------------------------------------------------------------------------------------------|-----------------------------------------------------------------------------------------------------------------------|----------------------------------------------------------------------------------------------------------------------------------------------------------------------------------------------------|-------------------------------------------------------------------------------------------------------------------------------------------------------------------------------------------------------------------------------------------------------------------------------|------------------------------------------------------------------------------------------------------------------------------------------------------------------------------------------------------------------------------------------------------------------------------------------------------------------------------------------|------------------------------------------------------------------------------------------------------------------------------------------------------------------------------------------------------------------------------------------------------------------------------------------------------------------|
| <b>Rapid tests</b><br>Request malarial testing and routine blood tests in all patients                                             | <b>Malarial antigen test (ICT format)</b><br>Sensitivity 95%<br>Specificity 95% for <i>P. falciparum</i><br>⌚ Minutes | <b>Antibody test</b><br>Sensitivity 47-98%<br>Specificity 58-100%<br>⌚ 2-4 hours                                                                                                                   | <b>Specific Immunoglobulin M test (ICT format)</b><br>Sensitivity 66%<br>Specificity 92%<br>⌚ Rapid<br><br><b>ELISA for specific Immunoglobulin M using recombinant antigens</b><br>Sensitivity variable<br>Specificity 90-100%<br>💰 Medium                                   | <b>Immunoglobulin M test</b><br>Sensitivity 13-22% in 1st week<br>~60% in 2nd week<br>~80% afterward<br>Specificity low<br>⌚ Hours                                                                                                                                                                                                       | <b>NS1 antigen test</b><br>Sensitivity 66%<br>Specificity 98%<br>⌚ Minutes<br><br><b>Immunoglobulin M test</b><br>Sensitivity 83%<br>Specificity 86%<br>⌚ Minutes                                                                                                                                                |
|                                                                                                                                    |                                                                                                                       |                                                                                                                                                                                                    |                                                                                                                                                                                                                                                                               |                                                                                                                                                                                                                                                                                                                                          |                                                                                                                                                                                                                                                                                                                  |
| <b>Confirmatory tests</b><br>The results of blood culture or serological tests may confirm the diagnosis and guide further therapy | <b>Microscopy</b><br>Detects as few as 5-10 parasites per µl of blood<br>⌚ 20-30 Minutes<br>💰 Inexpensive             | <b>Culture</b><br>Sensitivity 40-87%<br>Specificity 100%<br>⌚ 3-6 days<br><br><b>Widal test</b><br>Sensitivity depends on local prevalence<br>Specificity 100% (paired specimens)<br>💰 Inexpensive | <b>Immunofluorescent or Immunoperoxidase assay for antibodies</b><br>Sensitivity variable (100% with paired specimens)<br>💰 Expensive<br><br><b>Weil-Felix Test</b><br>Sensitivity variable<br>Specificity high (paired specimens)<br>low (single specimens)<br>💰 Inexpensive | <b>Microscopic agglutination test for antibody</b><br>Sensitivity 41% in 1st week<br>82% in 2nd-4th week<br>Specificity variable<br>💰 Expensive<br><br><b>Nucleic acid amplification</b><br>Specificity >95%, even in 1st week<br>💰 Expensive<br><br><b>Culture</b><br>Sensitivity low<br>Specificity 100%<br>⌚ Very slow<br>💰 Expensive | <b>Culture</b><br>Sensitivity ~40%<br>Specificity 100%<br>⌚ 1-2 weeks<br>💰 Expensive<br><br><b>Nucleic acid amplification</b><br>Sensitivity 60-100%<br>Specificity >95%<br>⌚ Same day<br>💰 Expensive<br><br><b>Serology</b><br>Specificity 100%<br>Retrospective in severe cases<br>⌚ Retrospective<br>💰 Medium |
|                                                                                                                                    |                                                                                                                       |                                                                                                                                                                                                    |                                                                                                                                                                                                                                                                               |                                                                                                                                                                                                                                                                                                                                          |                                                                                                                                                                                                                                                                                                                  |
|                                                                                                                                    | Malaria                                                                                                               | Enteric fever                                                                                                                                                                                      | Scrub typhus                                                                                                                                                                                                                                                                  | Leptospirosis                                                                                                                                                                                                                                                                                                                            | Dengue                                                                                                                                                                                                                                                                                                           |

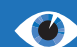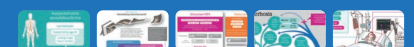

Supplement: anub038321.wi.pdf [file anub038321.wi.pdf]
